# Supplementary material for: Direct utilization of polysaccharides for methane production by a single deep-sea methanogen
Source: Research Square preprint supplement (doi:10.21203/rs.3.rs-6500675/v1), 2025-05-15
Supplement: Supplementary file 1 [file 79e963a3b8676583cfcb5023.xlsx]

## Sheet: Supplementary Table 1
Supplementary Table 1. Analysis of pectin degrading enzymes in deep-sea methanogenic archaea.
Strain names	Gene_id	Gene-encoded enzymes
Methanolobus sp. ZRKC1	V7O59_05360	Pectinesterase
	V7O59_11380	Oligogalacturonate lyase
Methanolobus sp. ZRKC2	V7O62_01290	Oligogalacturonate lyase
	V7O62_07315	Pectinesterase
	V7O62_12735	Periplasmic pectate lyase
Methanolobus sp. ZRKC3	V7O66_05670	Oligogalacturonate lyase
Methanolobus sp. ZRKC4	V7O67_05950	Periplasmic pectate lyase
	V7O67_09585	Pectinesterase
	V7O67_11155	Oligogalacturonate lyase
	V7O67_12840	Pectin methylesterase inhibitor
Methanolobus sp. ZRKC5	WN948_00675	Pectinesterase
	WN948_12160	Pectin methylesterase inhibitor
	WN948_13840	Oligogalacturonate lyase
Methanolobus sp. WCC1	V7O61_00135	Pectinesterase
	V7O61_09325	Oligogalacturonate lyase
Methanolobus sp. WCC4	V7O63_07990	Oligogalacturonate lyase
	V7O63_12315	Pectinesterase
Methanolobus sp. WCC5	V7O64_03495	Oligogalacturonate lyase
	V7O64_05665	Periplasmic pectate lyase

## Sheet: Supplementary Table 2
Supplementary Table 2. Analysis of the isolated sources of cultured archaea.
Strain names	Isolated sources
Methanobacterium alkalithermotolerans	Alkaline geothermal spring
Methanobrevibacter woesei	Sheep faeces
Methanobacterium lacus	A freshwater meromictic lake
Methanobacterium spitsbergense	Spitsbergen permafrost
Methanobacterium paludis	Northern peatlands
Methanobacterium petrolearium	Salty environments
Methanobacterium ferruginis	Salty environments
Methanobrevibacter wolinii	None
Methanobrevibacter boviskoreani	Rumen of Korean native cattle
Methanobrevibacter smithii	None
Methanobrevibacter acididurans	A sour anaerobic digester
Methanohalophilus euhalobius	None
Methanohalophilus portucalensis	None
Methanohalophilus halophilus	None
Methanohalophilus mahii	None
Methanomethylovorans hollandica	None
Methanolobus bombayensis	Arabian Sea sediments
Methanolobus vulcani	None
Methanolobus sediminis	Mangrove sediments
Methanolobus tindarius	None
Methanolobus mangrovi	Mangrove sediments
Methanolobus psychrotolerans	A saline meromictic lake
Methanolobus profundi	Deep subsurface sediments
Methanolobus zinderi	A deep subsurface coal seam
Methanolobus sp. ZRKC1	Deep-sea sediment
Methanolobus sp. ZRKC2	Deep-sea sediment
Methanolobus sp. ZRKC3	Deep-sea sediment
Methanolobus sp. ZRKC4	Deep-sea sediment
Methanolobus sp. ZRKC5	Deep-sea sediment
Methanolobus sp. WCC1	Deep-sea sediment
Methanolobus sp. WCC4	Deep-sea sediment
Methanolobus sp. WCC5	Deep-sea sediment
Methanocorpusculum labreanum	None
Methanocorpusculum bavaricum	None
Methanocorpusculum petauri	Faeces
Methanorbis furvi	None
Methanorbis rubei	None
Methanimicrococcus hongohii	None
Methanimicrococcus blatticola	Hindgut
Methanimicrococcus stummii	None
Methanolapillus ohkumae	None
Methanolapillus africanus	None
Methanolapillus millepedarum	None
Methanosarcina baikalica	Surface bottom sediments of Lake Baikal
Methanosarcina flavescens	A full-scale anaerobic digester
Methanosarcina thermophila	None
Methanosarcina spelaei	A floating biofilm of a subsurface sulphurous lake
Methanosarcina vacuolata	None
Methanosarcina barkeri	None
Methanosarcina lacustris	None
Methanosarcina acetivorans	None
Methanosarcina siciliae	None
Methanosarcina horonobensis	None
Methanosarcina mazei	None
Methanosarcina soligelidi	A Siberian permafrost-affected soil
Methanosphaerula palustris	None
Methanoculleus palmolei	A palm oil plant in North-Sumatra, Indonesia
Methanomassiliicoccus luminyensis	None
Candidatus Methanomassiliicoccus intestinalis	Human feces
Candidatus Bathyarchaeia archaeon	None
Candidatus Bathycorpusculum sp.	None
Candidatus Methanolliviera hydrocarbonicum	None
Candidatus Methanarcanum hacksteinii	None
Candidatus Methanoplasma termitum	None
Candidatus Methanogranum gryphiswaldense	None
Methanomethylophilus alvi	Human gut
Methanoregula boonei	None
Methanoregula formicica	None
Methanolinea mesophila	Rice field soil
Methanospirillum lacunae	A puddly soil
Methanospirillum stamsii	An anaerobic expanded granular sludge bed bioreactor
Methanospirillum hungatei	None
Methanospirillum purgamenti	A syntrophic pyrite-forming enrichment culture
Methanofollis fontis	Marine sediment near a cold seep
Methanofollis liminatans	None
Methanofollis tationis	A solfataric field on Mount Tatio
Methanolacinia paynteri	None
Methanolacinia petrolearia	None
Methanoplanus limicola	None
Methanoplanus endosymbiosus	An endosymbiont of the marine sapropelic ciliate Metopus contortus Quennerstedt
Methanoculleus taiwanensis	Deep marine sediment
Methanocalculus taiwanensis	An estuarine environment
Methanocalculus alkaliphilus	Hypersaline soda lakes
Methanocalculus chunghsingensis	A marine fishpond
Halorubrum vacuolatum	Lake Magadi
Haladaptatus paucihalophilus	None
Haladaptatus litoreus	A marine solar saltern
Halomicrococcus gelatinilyticus	Saline soil and an inland solar saltern
Halorientalis brevis	An inland salt lake of China
Halovenus carboxidivorans	Saline crusts and soils
Halovenus rubra	Salted brown alga Laminaria
Halovenus aranensis	Aran-Bidgol salt lake
Halovenus salina	A saltern
Halorussus halophilus	A marine solar saltern
Halorussus salinus	A marine solar saltern
Halorussus caseinilyticus	A tidal flat
Halorussus amylolyticus	An inland salt lake
Halorussus halobius	Salted brown alga Laminaria
Halorussus marinus	Salted brown alga Laminaria
Natronoarchaeum philippinense	A commercial solar salt
Natronoarchaeum rubrum	A marine solar saltern
Halostella litorea	Salted brown alga Laminaria
Halostella pelagica	Salted brown alga Laminaria
Halovivax limisalsi	A hypersaline mud
Halovivax ruber	None
Halovivax asiaticus	None
Halovivax cerinus	A hypersaline lake
Salinadaptatus halalkaliphilus	A salt pond
Halostagnicola larsenii	None
Halostagnicola kamekurae	A solar salt
Natribaculum luteum	A salt lake
Halopiger goleimassiliensis	None
Halobiforma haloterrestris	A hypersaline soil
Natrialba swarupiae	A hypersaline lake
Natronorubrum bangense	None
Natronorubrum aibiense	Aibi salt lake
Natronorubrum halophilum	An inland salt lake
Natronorubrum tibetense	None
Halopiger xanaduensis	None
Halopiger aswanensis	A hypersaline soil
Haloterrigena alkaliphila	A salt lake
Haloterrigena turkmenica	None
Haloterrigena salinisoli	A saline lake
Haloterrigena gelatinilytica	A salt lake
Haloterrigena salina	None
Haloterrigena salifodinae	A subterranean rock salt
Natrinema salaciae	Deep, hypersaline anoxic Lake Medee
Halomontanus rarus	A salt lake
Halopiger djelfimassiliensis	None
Natrinema marinum	Marine environment
Natrinema zhouii	A salt mine
Natrinema soli	A hypersaline wetland
Haloarchaeobius amylolyticus	A marine solar saltern
Natrinema limicola	None
Natrinema hispanicum	Fuente de Piedra
Natrinema saccharevitans	Aibi salt lake
Natrinema pellirubrum	None
Natrinema thermotolerans	None
Natrinema versiforme	None
Natrinema amylolyticum	A salt lake
Natrinema gari	None
Natrinema altunense	None
Natrinema ejinorense	A saline lake
Natrinema longum	A salt lake
Haloarchaeobius iranensis	A saline lake
Halorubellus salinus	A marine solar saltern
Halorubellus litoreus	A marine solar saltern
Salinarchaeum laminariae	Salted brown alga Laminaria
Halarchaeum rubridurum	Commercial sea salt sample
Halorientalis persicus	A salt lake
Halorientalis pallida	A marine saltern
Halomarina pelagica	Coastal saline soil
Halosegnis marinus	A tidal flat
Haloarcula laminariae	Salted brown alga Laminaria
Halobellus clavatus	Artificial marine solar saltern
Halobellus rubicundus	A Korean solar saltern
Halobellus rufus	Non-purified solar salt
Halorubrum halodurans	A hypersaline lake
Salinirubrum litoreum	A marine solar saltern
Halobium salinum	A marine solar saltern
Salinigranum rubrum	A marine solar saltern
Halegenticoccus soli	A soil sample of Ebi lake
Haloprofundus marisrubri	A brine-seawater interface
Haladaptatus caseinilyticus	Offshore sediment
Halogranum gelatinilyticum	A marine solar saltern
Halogranum rubrum	None
Halogeometricum rufum	A marine solar saltern
Halogeometricum luteum	None
Halogeometricum pallidum	Odiel Saltmarshes
Halogeometricum salsisoli	Odiel Saltmarshes
Haloferax profundi	The discovery deep brine-seawater interface in the Red Sea
Haloferax volcanii	None
Haloferax prahovense	None
Haloferax massiliensis	Stool specimen
Haloferax denitrificans	None
Haloferax sulfurifontis	None
Candidatus Halobonum tyrrellensis	Hypersaline waters of Lake Tyrrell
Halobaculum gomorrense	The Dead Sea
Halobaculum marinum	A marine solar saltern
Halobaculum litoreum	A marine solar saltern
Halohasta salina	An inland saline soil
Halohasta litchfieldiae	Daliang aquaculture farm
Halohasta litorea	Daliang aquaculture farm
Halalkalirubrum salinum	A saline lake
Natronocalculus amylovorans	Hypersaline soda lake
Natronomonas salsuginis	A marine solar saltern
Halobellus inordinatus	A marine solar saltern and an inland salt lake
Halorubrum aidingense	None
Halorubrum miltondacostae	An inland solar saltern
Halapricum salinum	A non-purified solar salt
Haloplanus ruber	A marine solar saltern and an aquaculture farm
Haloplanus aerogenes	A marine solar saltern
Haloplanus salinus	A Chinese marine solar saltern
Haloplanus rubicundus	A solar salt
Halosimplex litoreum	A marine solar saltern
Halosimplex aquaticum	Saline soil and an inland solar saltern
Halorientalis litorea	A coarse sea salt
Salinirussus salinus	A marine solar saltern
Salinibaculum salinum	A marine solar saltern
Salinibaculum rarum	A marine solar saltern
Halomicrobium mukohataei	None
Haloarcula pelagica	None
Halobellus litoreus	A Chinese marine solar saltern
Halobellus rarus	A Chinese marine solar saltern
Natronomonas moolapensis	None
Haloglomus irregulare	A marine saltern
Haloarcula pellucida	A solar salt
Haloarcula marina	A coastal saline-alkali land
Haloarcula onubensis	None
Haloarcula sediminis	An inland saline lake
Haloarcula salina	A marine solar saltern
Haloarcula brevis	A coastal saline soil
Haloarcula vallismortis	None
Haloarcula mannanilytica	A commercial salt
Haloarcula japonica	None
Haloarcula marismortui	None
Haloarcula quadrata	A brine pool
Haloarcula californiae	None
Haloarcula sinaiiensis	None
Haloarcula hispanica	None
Salinigranum halophilum	Marine solar salterns
Haloferax namakaokahaiae	A hypersaline cinder
Haloferax elongans	None
Haloferax larsenii	None
Haloferax mediterranei	None
Haloferax mucosum	None
Haloferax chudinovii	Permian potassium salt deposits
Haloferax marisrubri	Discovery deep brine-seawater interface in the Red Sea
Haloferax gibbonsii	None
Halopelagius longus	A salt mine
Halopelagius fulvigenes	A lake
Halogeometricum limi	A marine solar saltern
Halogeometricum borinquense	None
Salinirubellus salinus	A marine solar saltern
Haloglomus salinum	A marine solar salt
Haloglomus litoreum	A tidal flat
Halonotius pteroides	None
Halonotius aquaticus	A marine saltern
Halorarius litoreus	A tidal flat
Haloquadratum walsbyi	None
Halobaculum limi	A tidal flat and a marine solar saltern
Halobaculum lipolyticum	None
Halorubrum coriense	None
Salinigranum marinum	Sediment of a marine saltern and inland saline soil
Haloplanus natans	None
Natronomonas gomsonensis	A solar saltern
Haloplanus vescus	A marine solar saltern
Halolamina pelagica	A marine solar saltern
Halolamina litorea	A marine solar saltern
Halobellus ruber	A Korean solar saltern
Halobellus salinus	A marine solar saltern
Haloplanus rallus	A crude solar salt
Haloplanus salinarum	A solar saltern
Halopenitus persicus	An inland salt lake
Halorubrum halophilum	A salt-fermented seafood
Halorubrum saccharovorum	None
Halorubrum amylolyticum	A salt mine
Halorubrum rutilum	A marine solar saltern
Natrialba taiwanensis	None
Natrialba aegyptia	None
Halomicrobium zhouii	A marine solar saltern
Halorientalis halophila	A saline lake and inland saline soil
Halosegnis rubeus	None
Halorubrum xinjiangense	A saline lake
Halorubrum lipolyticum	None
Halorubrum kocurii	None
Halorubrum ezzemoulense	None
Halorubrum laminariae	Salted brown alga Laminaria
Halorubrum distributum	None
Halorubrum terrestre	None

## Sheet: Supplementary Table 3
Supplementary Table 3. Primers used for qRT-PCR.
Primer name	Nucleotide Sequence (5’-3’)
16S-F	GTACCTCTTACCTCTCCCGGT
16S-R	CCGTAGCCGGTTTGATCAGT
PPK1-F	TGTCATCCAGTCCGAAACGG
PPK1-R	AAGTTCCTGCAGACGTGCTT
PPK2-F	GGTAACTCCAGTGGGAGTGC
PPK2-R	TCCATACCAGCTCCGGTCA
